# Supplementary material for: Bacterial virulence against an oceanic bloom-forming phytoplankter is mediated by algal DMSP
Source: PubMed Central journal article supplement — Sci Adv. 2018 Oct 24;4(10):eaau5716. doi: 10.1126/sciadv.aau5716 (PMC6200362; doi:10.1126/sciadv.aau5716), 2018-10-24
Supplement: aau5716_SM.pdf [file aau5716_SM.pdf]

## Supplementary Materials for

### **Bacterial virulence against an oceanic bloom-forming phytoplankter is mediated by algal DMSP**

Noa Barak-Gavish, Miguel José Frada, Chuan Ku, Peter A. Lee, Giacomo R. DiTullio, Sergey Malitsky, Asaph Aharoni, Stefan J. Green, Ron Rotkopf, Elena Kartvelishvily, Uri Sheyn, Daniella Schatz, Assaf Vardi\*

\*Corresponding author. Email: [assaf.vardi@weizmann.ac.il](mailto:assaf.vardi@weizmann.ac.il)

Published 24 October 2018, *Sci. Adv.* **4**, eaau5716 (2018)

DOI: 10.1126/sciadv.aau5716

#### **This PDF file includes:**

Text S1. Coculturing of *E. huxleyi* with the CAM exhibits similar phases of pathogenicity to that of *Sulfitobacter* D7.

Text S2. *Sulfitobacter* D7 consumes DMSP and produces MeSH but not DMS.

Fig. S1. Algicidal effect of the CAM on *E. huxleyi*.

Fig. S2. Phylogenetic analysis of *Sulfitobacter* D7 within the *Roseobacter* group.

Fig. S3. *Marinobacter* D6 isolated from CAM has no algicidal effect when cocultured with *E. huxleyi*.

Fig. S4. Headspace analysis of volatiles produced during algae-bacteria interactions using SPME coupled to GC-MS.

Fig. S5. Representative chromatograms of VOSC standards in GC-FPD analysis.

Fig. S6. *Sulfitobacter* D7 genome encodes a DMSP catabolic pathway.

Fig. S7. DMSP promotes *Sulfitobacter* D7 virulence toward *E. huxleyi* in a dose-dependent manner.

Fig. S8. DMSP promotes growth of *Sulfitobacter* D7.

Fig. S9. *E. huxleyi* and *Sulfitobacter* D7 coculturing dynamics.

Table S1. Evaluation of DMSP<sub>d</sub>, MeSH, DMDS, DMS, and bacterial abundances after 24-hour incubation of *Sulfitobacter* D7 in CM obtained from uninfected *E. huxleyi* 379 cultures (*E. huxleyi*-CM) or MM supplemented with DMSP.

Table S2. Comparison of parameters related to *Sulfitobacter* D7 infection dynamics in various *E. huxleyi* strains.

Reference (71)

## Supplementary Text

### **Text S1. Coculturing of *E. huxleyi* with the CAM exhibits similar phases of pathogenicity to that of *Sulfitobacter* D7.**

Time course of *E. huxleyi* cultures incubated with CAM (fig. S1C-E) showed three-phase dynamics, similar to co-culturing with *Sulfitobacter* D7 (Fig. 1B-D). In phase I, algal cultures grew exponentially until day 5, similar to control cultures (fig. S1C). In phase II, while control cultures kept growing, CAM-treated cultures entered a short 2-day stationary phase. During the 4 days of phase III, there was a rapid decline in algal abundance, while control cultures kept growing until they reached stationary phase. Induction of algal cell death (determined by SYTOX green staining) in phase III occurred in ~80% of the population (fig. S1D) and was concomitant with rapid exponential growth of bacteria (overall growth of four orders of magnitude) (fig. S1E). Interestingly, during phases II and III of co-culturing, we detected a similar scent to that emitted during incubation of *E. huxleyi* with *Sulfitobacter* D7 (fig. S1C-E, represented by green background). Interestingly, the abundance of *Sulfitobacter* D7 during co-culturing with CAM increased steadily by 3 orders of magnitude, as quantified by qPCR (fig. S1E, inset).

### **Text S2. *Sulfitobacter* D7 consumes DMSP and produces MeSH but not DMS.**

In order to characterize the origin of MeSH production during *Sulfitobacter* D7-infection of *E. huxleyi* (Fig. 3), we obtained conditioned media (CM) derived from 0.22  $\mu\text{m}$  filtrate of uninfected *E. huxleyi* cultures at stationary phase (*E. huxleyi*-CM). We inoculated *Sulfitobacter* D7 in *E. huxleyi*-CM and found that after 24h of incubation the concentration of DMSP<sub>d</sub> was 51  $\mu\text{M}$ , while in uninoculated (blank) *E. huxleyi*-CM it was 72  $\mu\text{M}$  (table S1). Namely, *Sulfitobacter* D7 consumed ~21  $\mu\text{M}$  DMSP<sub>d</sub> from the medium concomitant to production of MeSH. In order to validate that the production of MeSH by *Sulfitobacter* D7 resulted from DMSP (rather than other substrates within *E. huxleyi*-CM), we inoculated *Sulfitobacter* D7 in minimal media (MM) supplemented with synthetic DMSP. Also here, *Sulfitobacter* D7 consumed DMSP<sub>d</sub> and produced MeSH but to a lesser extent than in *E. huxleyi*-CM (table S1). A similar observation was seen for the

bacterial growth. This implies that *E. huxleyi*-CM contains other substances that promote *Sulfitobacter D7* growth and metabolism. Taken together, *Sulfitobacter D7* can produce MeSH from DMSP<sub>d</sub> in MM and in *E. huxleyi*-CM and most likely during *Sulfitobacter D7*-infection of *E. huxleyi*. Interestingly, in both media the concentration of DMS was similar between uninoculated and inoculated media (table S1). Therefore, it seems that *Sulfitobacter D7* does not produce DMS from DMSP. *Sulfitobacter* spp. have been reported to encode for DddL, a DMSP-lyase enzyme (14, 71), however, we did not detect any homologs of a DMSP-lyase (*ddd* genes) in *Sulfitobacter D7* genome.

## Supplementary Figures

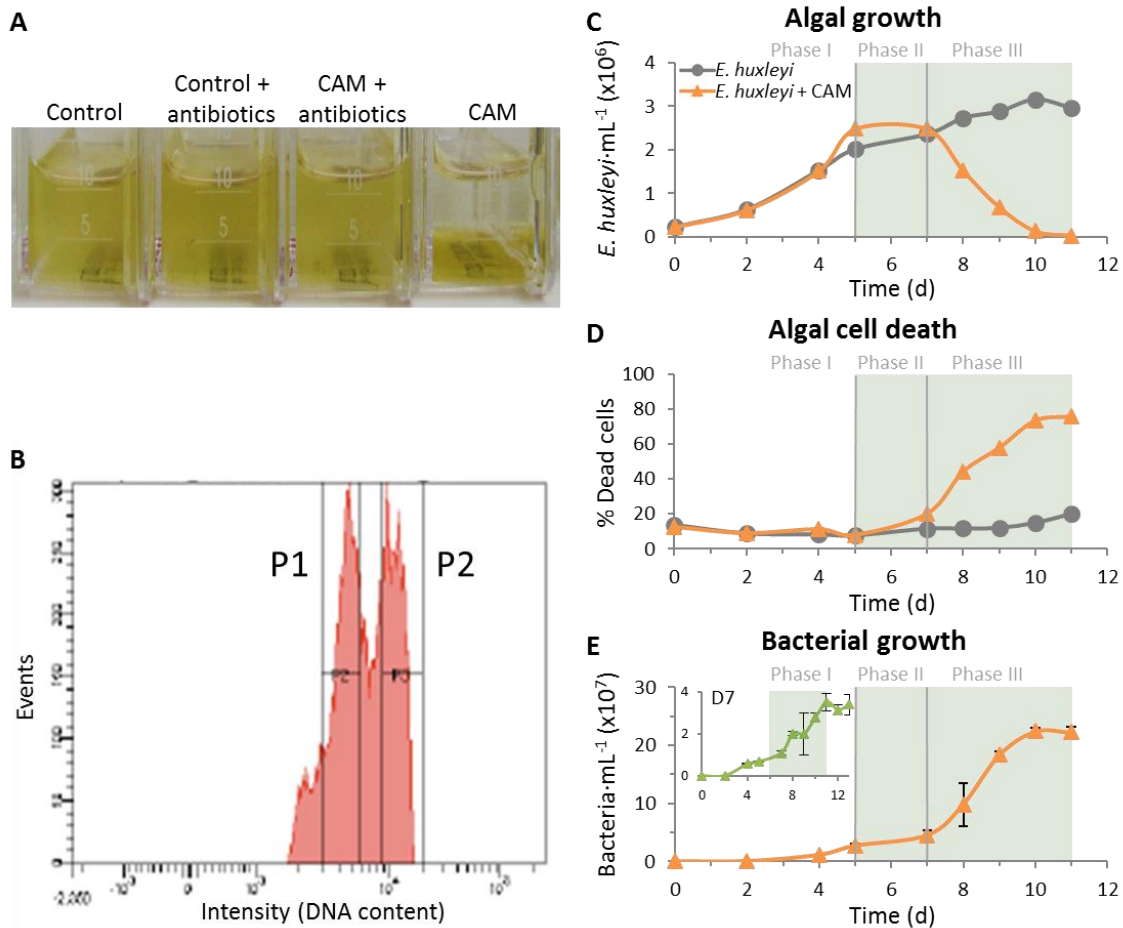

**Fig. S1. Algicidal effect of the CAM on *E. huxleyi*.** (A) Picture of *E. huxleyi* 379 cultures (control or incubated with CAM) applied (or not) with penicillin and streptomycin antibiotics mix. (B) Flow cytometric analysis of bacterial populations, stained with SYTO13, in *E. huxleyi* 379 cultures incubated with CAM after 7 days of growth. Bacteria were differentiated based on green fluorescence (530/30 nm) intensity (arbitrary units) corresponding to DNA content. Two bacterial sub-populations were sorted: P1 and P2, featured low and high green fluorescence intensity, respectively. *Sulfitobacter* D7 and *Marinobacter* D6 were each isolated from a single colony of P2 population plated on marine agar. (C-E) A detailed time course of *E. huxleyi* 379 mono-cultures (grey line) and during co-culturing with CAM (orange line). The following parameters were assessed: algal growth (C), algal cell death (D) and bacterial growth (E). Inset in (E): quantification of *Sulfitobacter* D7 abundance during co-culturing of *E.*

*huxleyi* with CAM, determined by qPCR analysis. No bacterial growth was observed in control cultures. Green background represents the presence of a pungent scent in co-cultures. Alga-bacteria co-culturing had distinct dynamics characterized by defined phases (I-III) of pathogenicity. Results depicted in (C-E) represent average  $\pm$  SD (n = 3). Error bars < than symbol size are not shown. Statistical differences in (C-E) were tested using repeated measures ANOVA. *P*-values are <0.001 for the differences between control and CAM-treated *E. huxleyi* cultures.

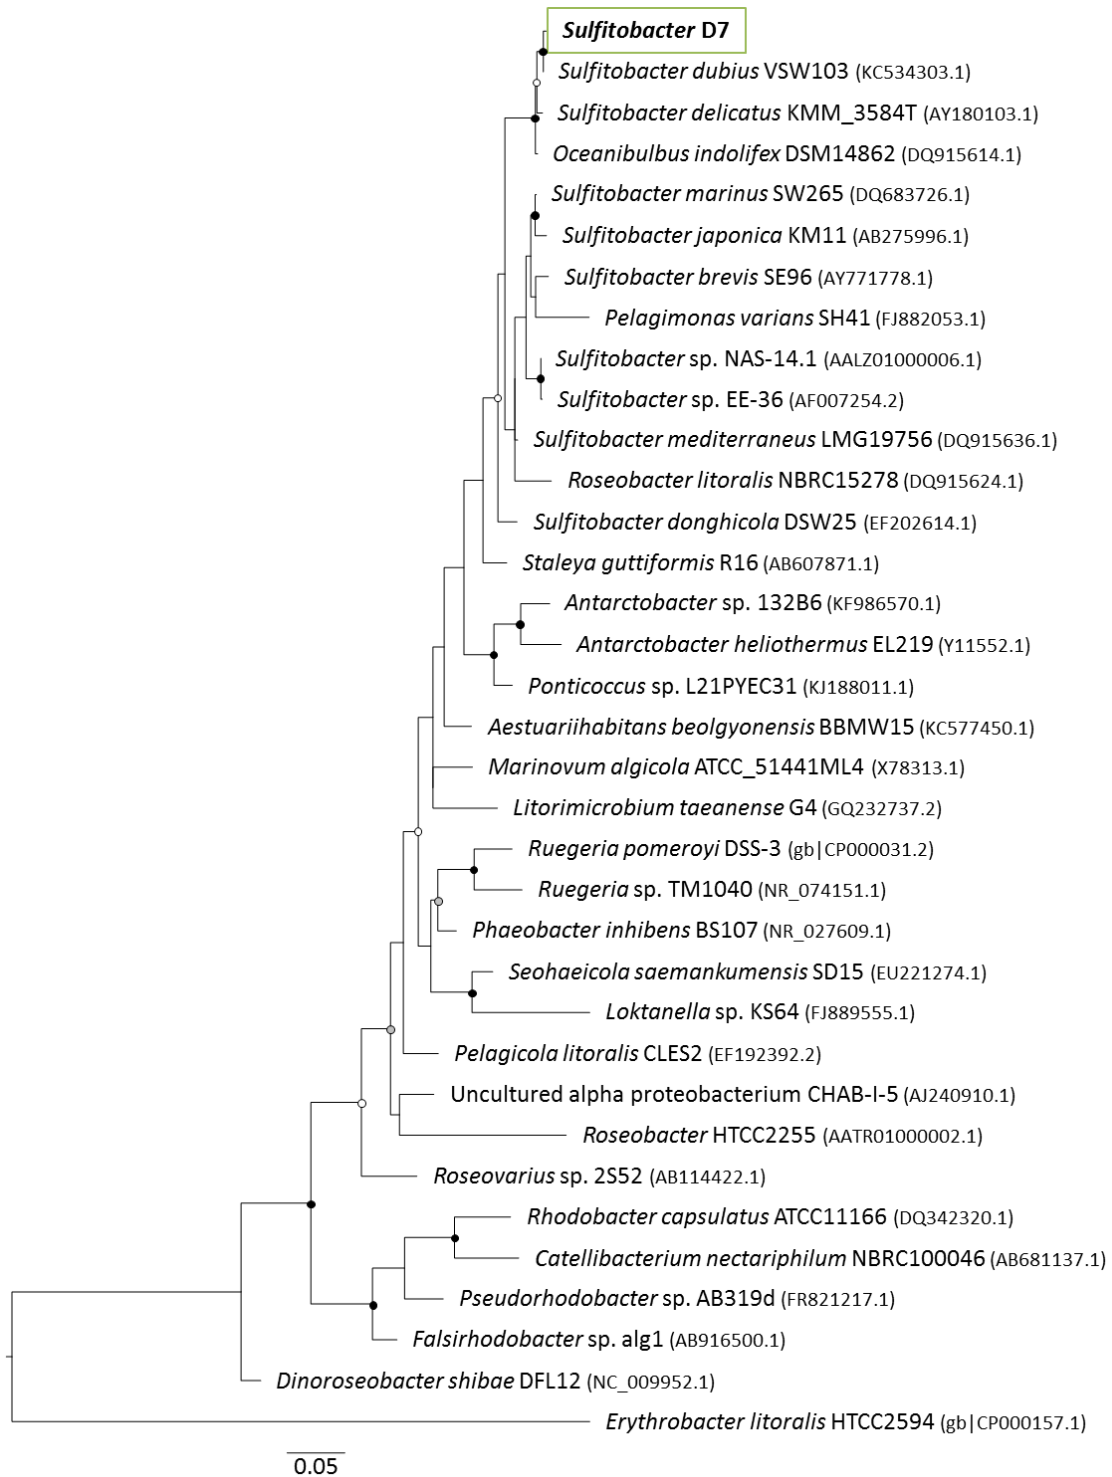

**Fig. S2. Phylogenetic analysis of *Sulfitobacter D7* within the *Roseobacter* group.** Maximum likelihood phylogenetic tree of the *Roseobacter* group of the  $\alpha$ -Proteobacteria class, based on 16S rRNA gene. Bootstrap values (based on 1000 replicates) are specified

with circles at the nodes (white  $\geq 50\%$ , grey  $\geq 70\%$ , black  $\geq 90\%$ ). *Sulfitobacter* D7 isolate can be found within the group (green box), closely associated with *Sulfitobacter dubius*. *Erythrobacter lithoralis*, affiliated to the  $\alpha$ -Proteobacteria class, was used as an outgroup.

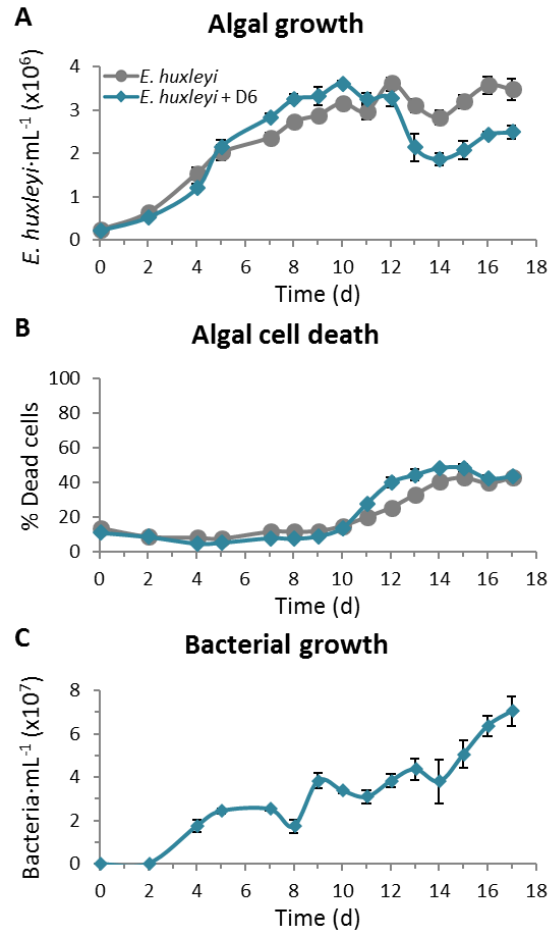

**Fig. S3. *Marinobacter* D6 isolated from CAM has no algicidal effect when cocultured with *E. huxleyi*.** A detailed time course of *E. huxleyi* 379 mono-cultures (grey line) and during co-culturing with *Marinobacter* D6 (blue line). The following parameters were assessed: (A) algal growth, (B) algal cell death and (C) bacterial growth. No bacterial growth was observed in control cultures. Results represent average  $\pm$  SD (n = 3). Error bars < than symbol size are not shown. Statistical differences were tested using repeated measures ANOVA. *P*-values are <0.05 for the differences between control and D6-treated *E. huxleyi* cultures.



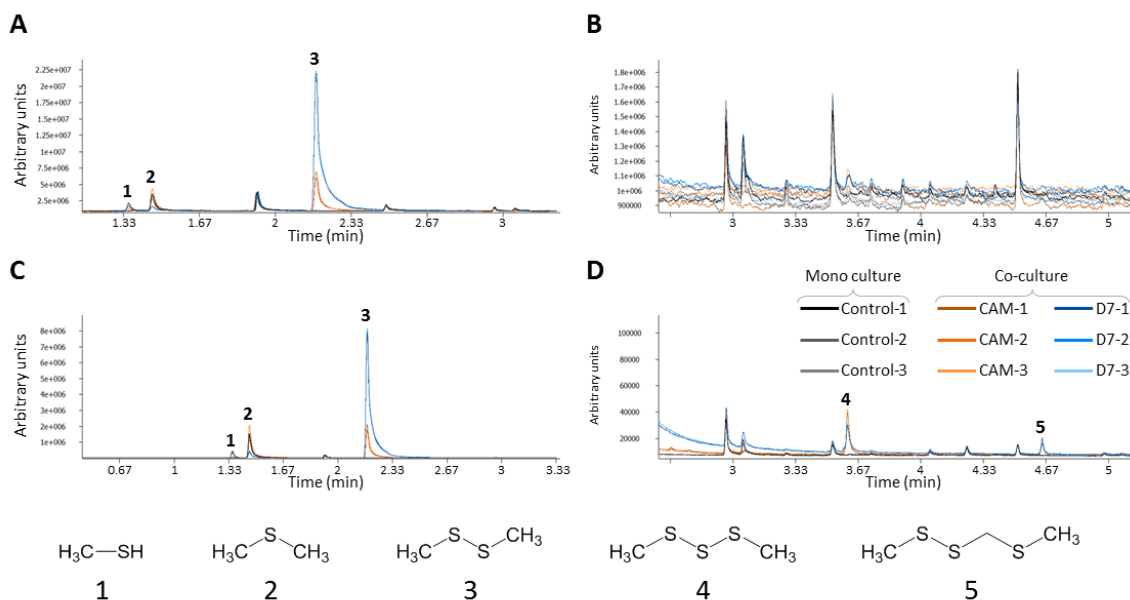

**Fig. S4. Headspace analysis of volatiles produced during algae-bacteria interactions using SPME coupled to GC-MS. (A-B)** Representative total ion chromatograms of headspaces of control, CAM- and *Sulfitobacter* D7-infected *E. huxleyi* 379 cultures at 10 days of growth (phase III). Detected compounds- 1: methanethiol (MeSH); 2: dimethyl sulfide (DMS); 3: dimethyl disulfide (DMDS), 4: dimethyl trisulfide (DMTS); 5: methyl methylthiomethyl disulfide. **(C-D)** Extracted ion chromatograms represent characteristic masses (47, 62, 94, 61, 126  $m/z$ ) of compounds 1-5, respectively. Analysis was done in triplicates.

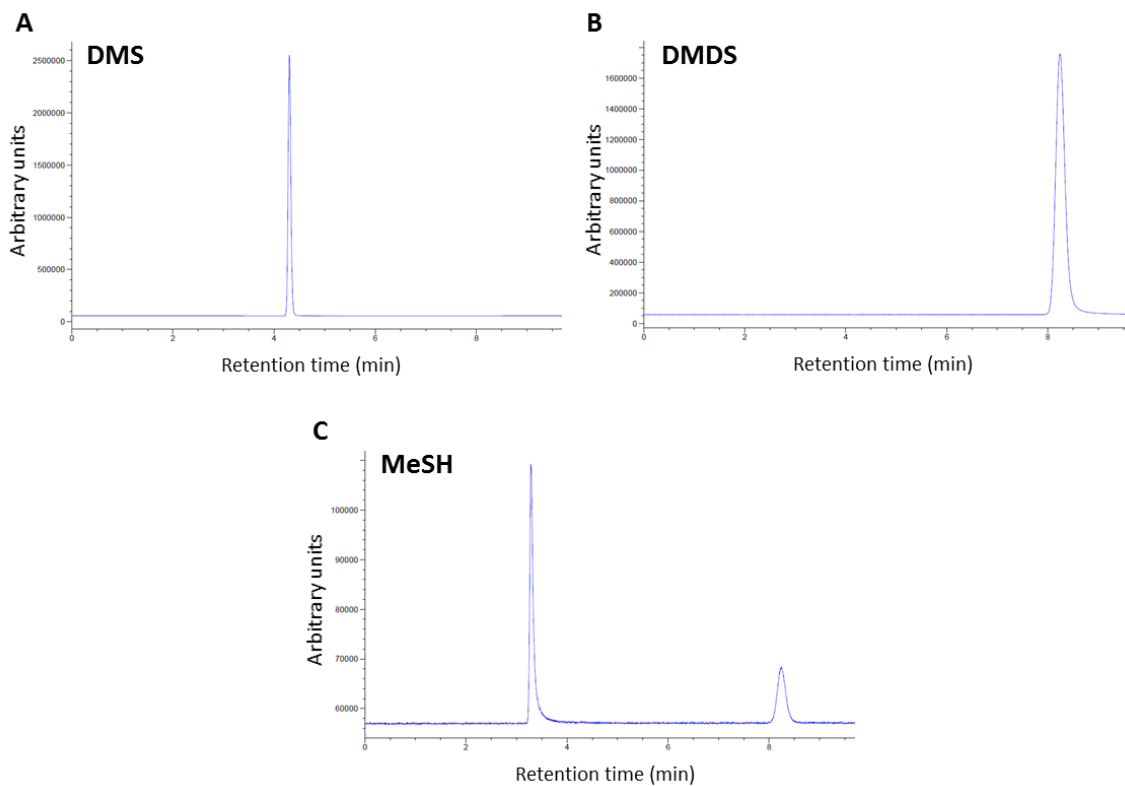

**Fig. S5. Representative chromatograms of VOSC standards in GC-FPD analysis.**

Representative GC-FPD chromatograms of 150 nM of (A) dimethyl sulfide (DMS), retention time of 4.3 min; (B) dimethyl disulfide (DMDS), retention time of 8.2 min; and (C) methanethiol (MeSH), retention time of 3.3 min. The additional peak in (C) is DMDS which is a product of MeSH oxidation that occurred during the GC-FPD procedure (39).

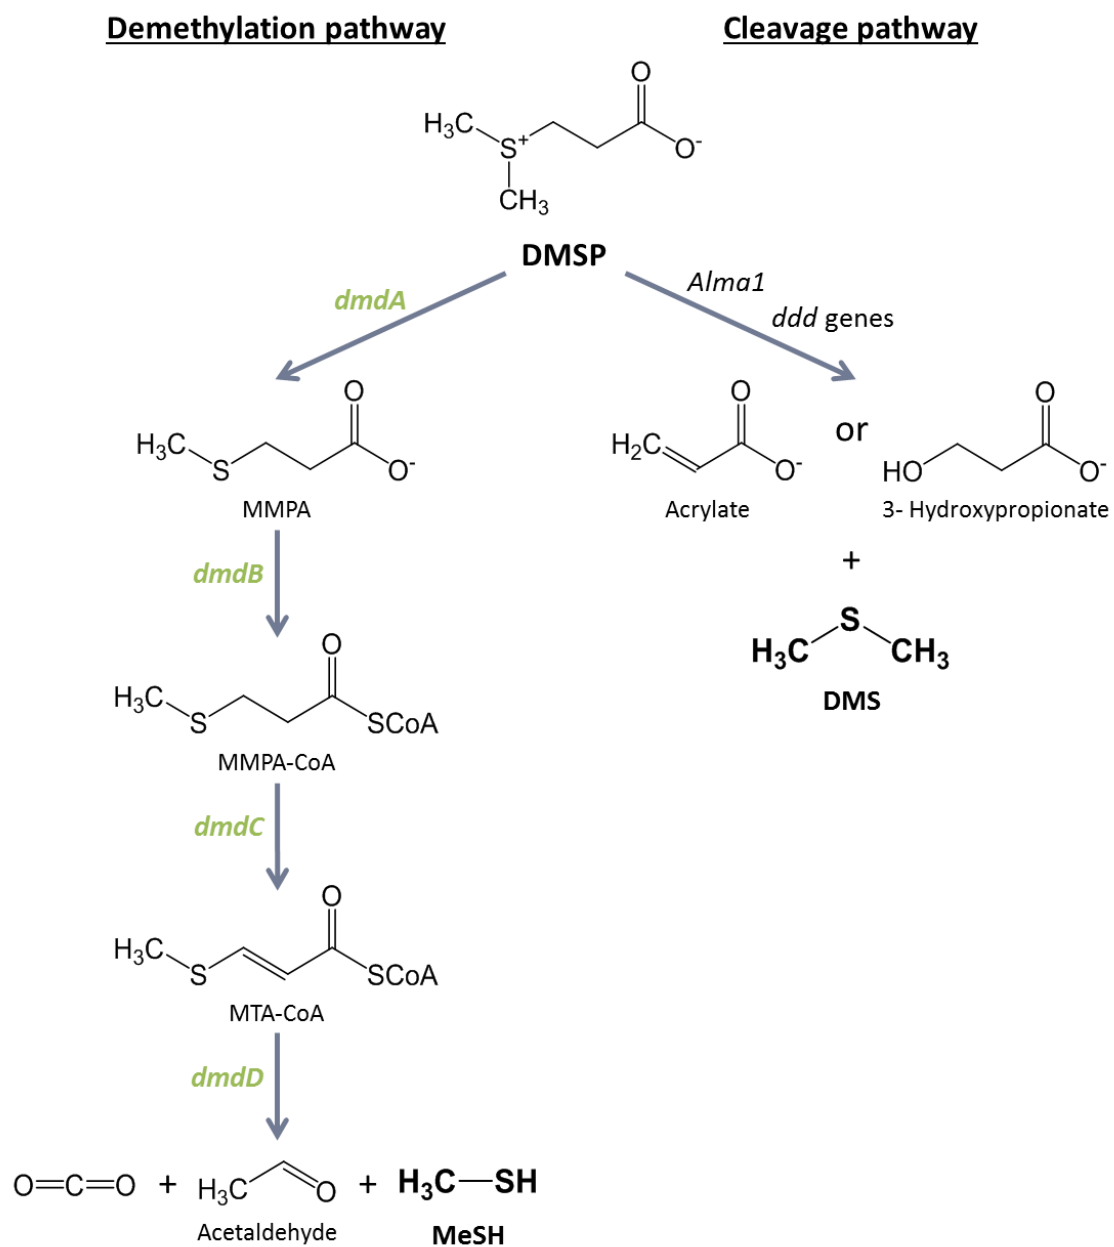

**Fig. S6. *Sulfitobacter D7* genome encodes a DMSP catabolic pathway.** Competing DMSP catabolic pathways. Genes encoding enzymes mediating each transformation are specified next to the arrow. Genes of the demethylation pathway, highlighted in green, are present in *Sulfitobacter D7* genome. MMPA, methylmercaptopropionate; CoA,

coenzyme A; MMPA-CoA, methylmercaptopropionate-CoA; MTA-CoA, methylthioacryloyl-CoA.

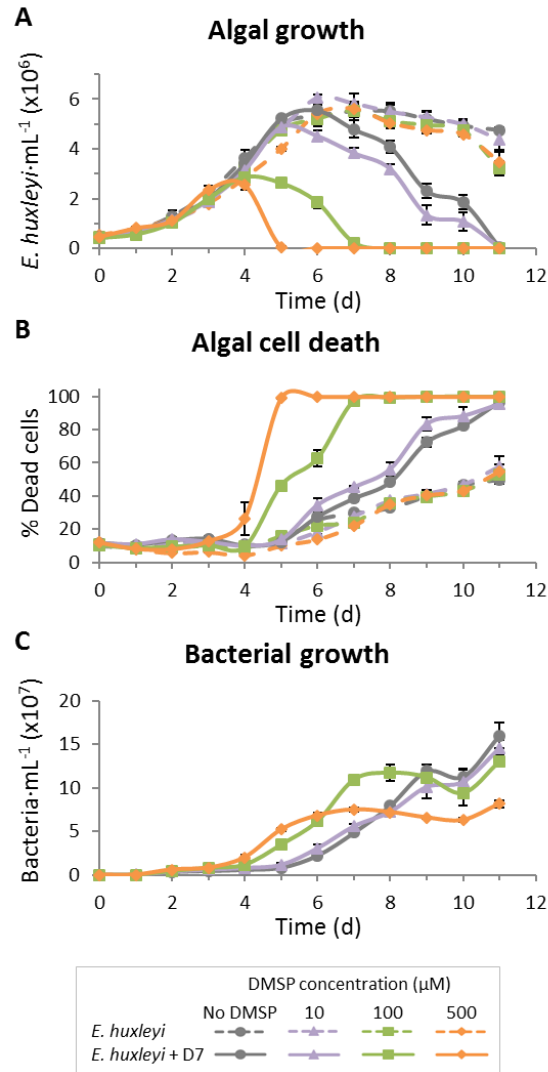

**Fig. S7. DMSP promotes *Sulfitobacter* D7 virulence toward *E. huxleyi* in a dose-dependent manner.** Time course of *E. huxleyi* 379 mono-cultures (dashed lines) and during co-culturing with *Sulfitobacter* D7 (smooth lines). DMSP was applied at day 0 to a final concentration of 10  $\mu\text{M}$  (purple, triangle), 100  $\mu\text{M}$  (green, square), 500  $\mu\text{M}$  (orange, diamond) or none (gray, circle). The following parameters were assessed: (A) algal growth, (B) algal cell death and (C) bacterial growth. No bacterial growth was observed in control cultures. Results represent average  $\pm$  SD ( $n = 3$ ). Error bars < than symbol size are not shown. Statistical differences were tested using two-way repeated measures ANOVA, accounting for infection and DMSP concentration. *P*-values in (A) and (B) are <0.001 for the differences between control and co-cultures and for the

differences between the DMSP treatments in co-cultures. *P*-values in (C) are <0.001 for the differences between the 100  $\mu$ M DMSP treatment and the rest of the co-cultures.

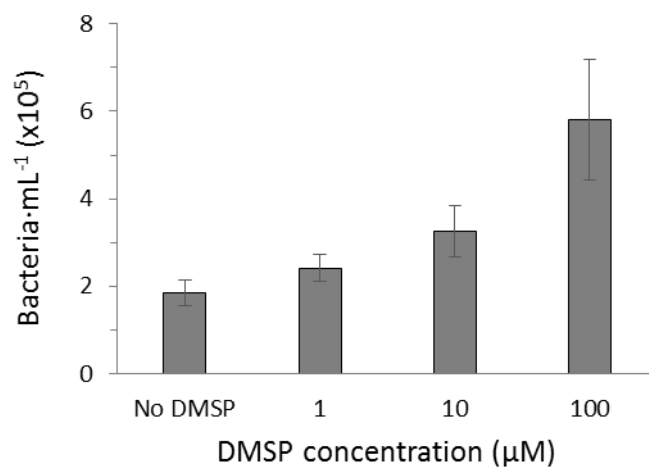

**Fig. S8. DMSP promotes growth of *Sulfitobacter* D7.** *Sulfitobacter* D7 abundance after 16 h of growth in minimal media (MM) supplemented with different concentrations of DMSP. Results represent average  $\pm$  SD ( $n = 3$ ). Statistical differences were tested using one-way ANOVA, followed by a Tukey post-hoc test.  $P$ -values are  $<0.01$  and  $<0.05$  for the differences of the 100  $\mu\text{M}$  concentration from the “No DMSP” and 1  $\mu\text{M}$  concentration, respectively.

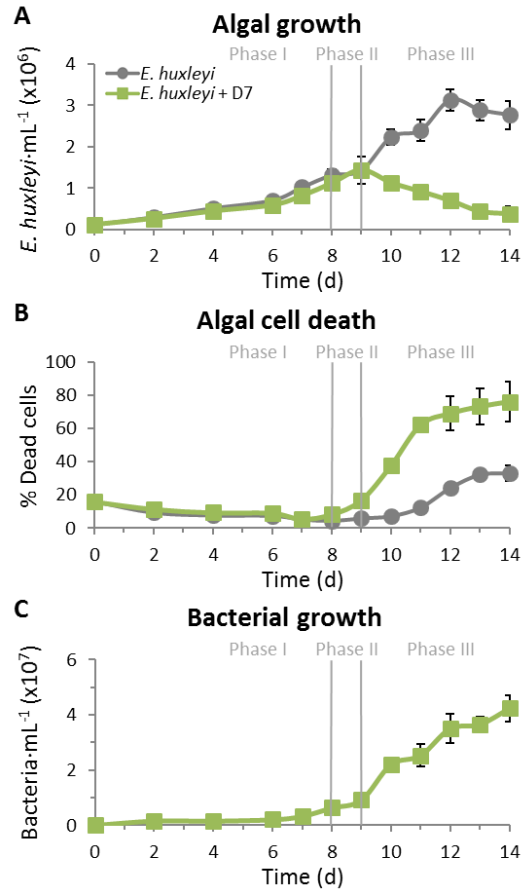

**Fig. S9. *E. huxleyi* and *Sulfitobacter* D7 coculturing dynamics.** Time course of *E. huxleyi* 379 mono-cultures (grey line) and during co-culturing with *Sulfitobacter* D7 (green line) from the experiment presented in Fig. 3. The following parameters were assessed: (A) algal growth, (B) algal cell death and (C) bacterial growth. No bacterial growth was observed in control cultures. Defined phases (I-III) of pathogenicity are denoted. Results represent average  $\pm$  SD (control, n = 4; *Sulfitobacter* D7-infected, n = 2). Error bars < than symbol size are not shown. Statistical differences were tested using repeated measures ANOVA. *P*-values are <0.001 for the differences between control and co-cultures.



## Supplementary Tables

**Table S1. Evaluation of DMSP<sub>d</sub>, MeSH, DMDS, DMS, and bacterial abundances after 24-hour incubation of *Sulfitobacter* D7 in CM obtained from uninfected *E. huxleyi* 379 cultures (*E. huxleyi*-CM) or MM supplemented with DMSP.**

|                       |                   | DMSP <sub>d</sub><br>( $\mu$ M) | MeSH <sup>a</sup> | DMDS<br>(nM) <sup>b</sup> | DMS<br>(nM)  | <i>Sulfitobacter</i> D7<br>abundance ( $10^6 \cdot \text{mL}^{-1}$ ) |
|-----------------------|-------------------|---------------------------------|-------------------|---------------------------|--------------|----------------------------------------------------------------------|
| <i>E. huxleyi</i> -CM | - D7 <sup>c</sup> | 72                              | –                 | –                         | 406          | –                                                                    |
|                       | + D7 <sup>d</sup> | 51 $\pm$ 0.3                    | 1017 $\pm$ 34     | 465 $\pm$ 11              | 398 $\pm$ 24 | 94.4 $\pm$ 0.5                                                       |
| MM + DMSP             | - D7 <sup>c</sup> | 70                              | –                 | –                         | 23           | –                                                                    |
|                       | + D7 <sup>f</sup> | 65 $\pm$ 1                      | 46 $\pm$ 33       | 276 $\pm$ 19              | 16 $\pm$ 1.5 | 10.14 $\pm$ 0.97                                                     |

<sup>a</sup> Square root of peak area

<sup>b</sup> DMDS is presumably an oxidation product of MeSH (Fig. S5c) and therefore considered as part of the MeSH pool

<sup>c</sup> Blank media without *Sulfitobacter* D7 (n = 1)

<sup>d,f</sup> Results represent average  $\pm$  SD (<sup>d</sup>n = 2, <sup>f</sup>n = 3)

*P*-values were calculated for all parameters between *Sulfitobacter* D7-inoculated media and are <0.01

**Table S2. Comparison of parameters related to *Sulfitobacter* D7 infection dynamics in various *E. huxleyi* strains.**

|                                                                                                                               | <i>Emiliana huxleyi</i> strain |            |            |           |
|-------------------------------------------------------------------------------------------------------------------------------|--------------------------------|------------|------------|-----------|
|                                                                                                                               | 379                            | 1216       | 373        | 2090      |
| DMSP <sub>d</sub> (μM) at stationary growth <sup>a</sup>                                                                      | 71.9 ± 1.8                     | 27.1 ± 0.4 | 13.2 ± 0.8 | 5.5 ± 0.1 |
| Duration of phase III (days) <sup>b</sup>                                                                                     | 5                              | 7          | 10         | –         |
| Duration of phase II (days)                                                                                                   | 1                              | 4          | 2          | 16        |
| <i>Sulfitobacter</i> D7 abundance on phase III initiation (10 <sup>7</sup> ·mL <sup>-1</sup> )                                | 1.28 ± 0.5                     | 2.9 ± 0.3  | 1.28 ± 0.2 | –         |
| Maximum <i>Sulfitobacter</i> D7 abundance during co-culturing (10 <sup>7</sup> ·mL <sup>-1</sup> ) <sup>c</sup>               | 15 ± 0.3                       | 12 ± 0.7   | 15 ± 0.4   | 1.5 ± 0.6 |
| <i>Sulfitobacter</i> D7 abundance after 24h growth in <i>E. huxleyi</i> -CM (10 <sup>7</sup> ·mL <sup>-1</sup> ) <sup>d</sup> | 12 ± 0.7                       | 7.5 ± 0.2  | 2 ± 0.2    | 0.8 ± 0.2 |

Results represent average ± SD (n = 3)

<sup>a</sup> At 11 days of mono-culture (Fig. 4A)

<sup>b</sup> Until *E. huxleyi* cultures reached <1% of maximum growth (Fig. 4C-F)

<sup>c</sup> For 2090 at t = 20d, other strains at t = 21d (Fig. 4C-F)

<sup>d</sup> Conditioned media (CM) was derived from the same cultures presented in the first row of this table
